# Supplementary material
Source: PubMed Central journal article supplement (PMC5554319)
Supplement: BPH-174-2912-s001.pdf [file BPH-174-2912-s001.pdf]

## Supplemental data

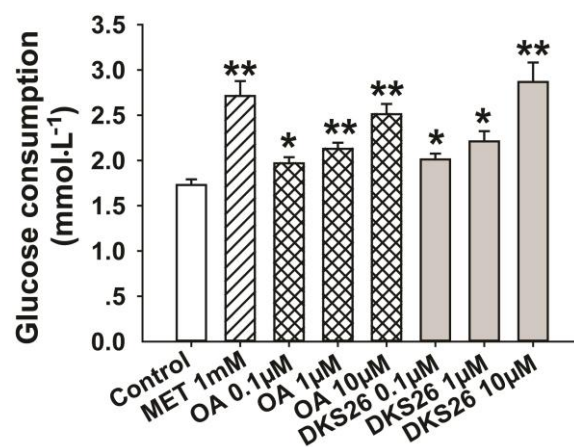

Figure S1 Effects of DKS26 on the glucose consumption in human hepatic HepG2 Cells. OA represented oleanolic acid, MET represented metformin. Values are expressed as mean  $\pm$  SEM (n= 3). Compared with control group, \*  $P < 0.05$ , \*\*  $P < 0.01$ . Glucose consumption = glucose concentrations of blank wells – glucose concentrations of cell plated wells. The glucose consumption values were adjusted by SRB test. This glucose lowering activity *in vitro* showed that DKS26 might have hypoglycemic effects *in vivo*.

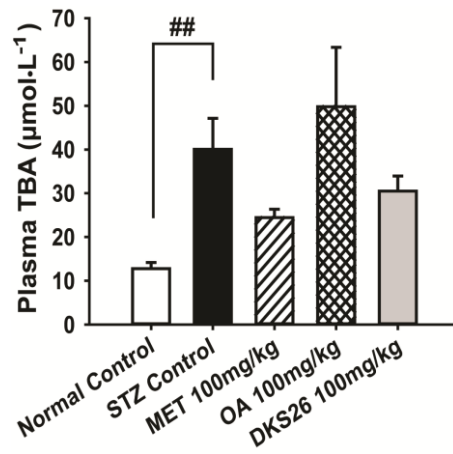

Figure S2 Effects of DKS26 on plasma total bile acids (TBA) levels in STZ-induced diabetic mice for 33 days' administration. OA represented oleanolic acid, MET represented metformin. Values are expressed as mean  $\pm$  SEM. Normal Control (n = 5), STZ control (n= 7) and other groups (n= 8). Compared with normal control group, <sup>##</sup> $P < 0.01$ .

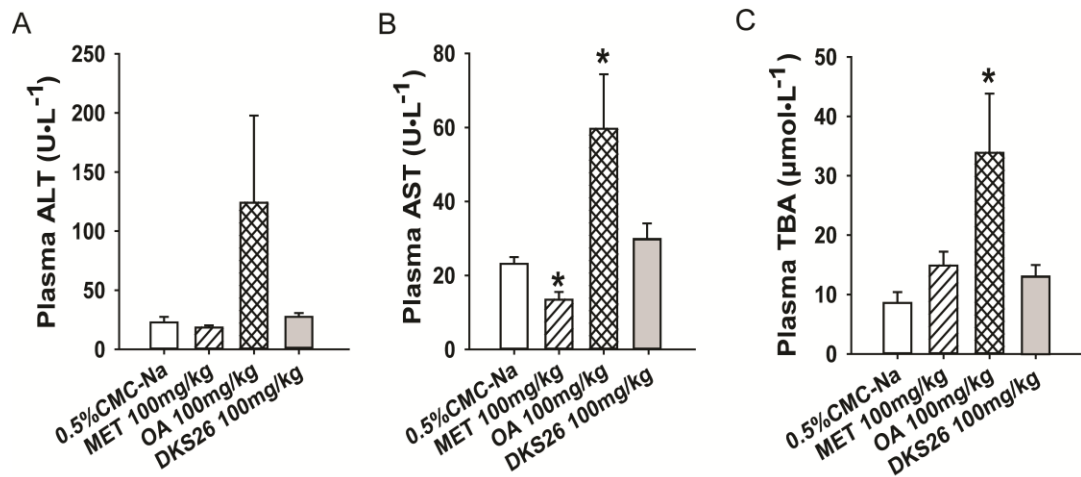

Figure S3 Effects of DKS26 on hepatic function and plasma total bile acids (TBA) levels in normal ICR mice for 8 days. OA represented oleanolic acid, MET represented metformin. Values are expressed as mean  $\pm$  SEM (OA group n= 5 and other groups n= 6). Compared with control group, \* $P$ <0.05, \*\* $P$ <0.01, \*\*\* $P$ <0.001. These findings indicated that the effect of DKS26 on hepatic injury in normal mice was significantly lower than OA.

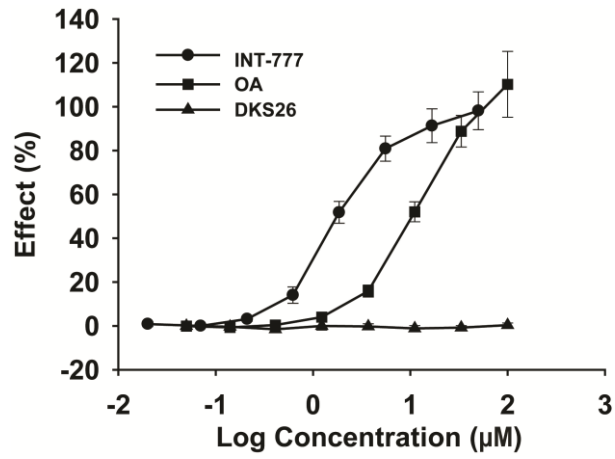

Figure S4 Direct effects of DKS26 on TGR5 in HEK293/pGL4.29/hTGR5 cells. Effect (%) was calculated as relative effect of 20 µM INT-777 regarded as 100%. EC50 was  $1.77 \pm 0.45 \mu\text{M}$  and  $13.66 \pm 1.81 \mu\text{M}$  for INT-777 and OA, respectively. OA represented oleanolic acid. Values are expressed as mean  $\pm$  SD (n= 3).

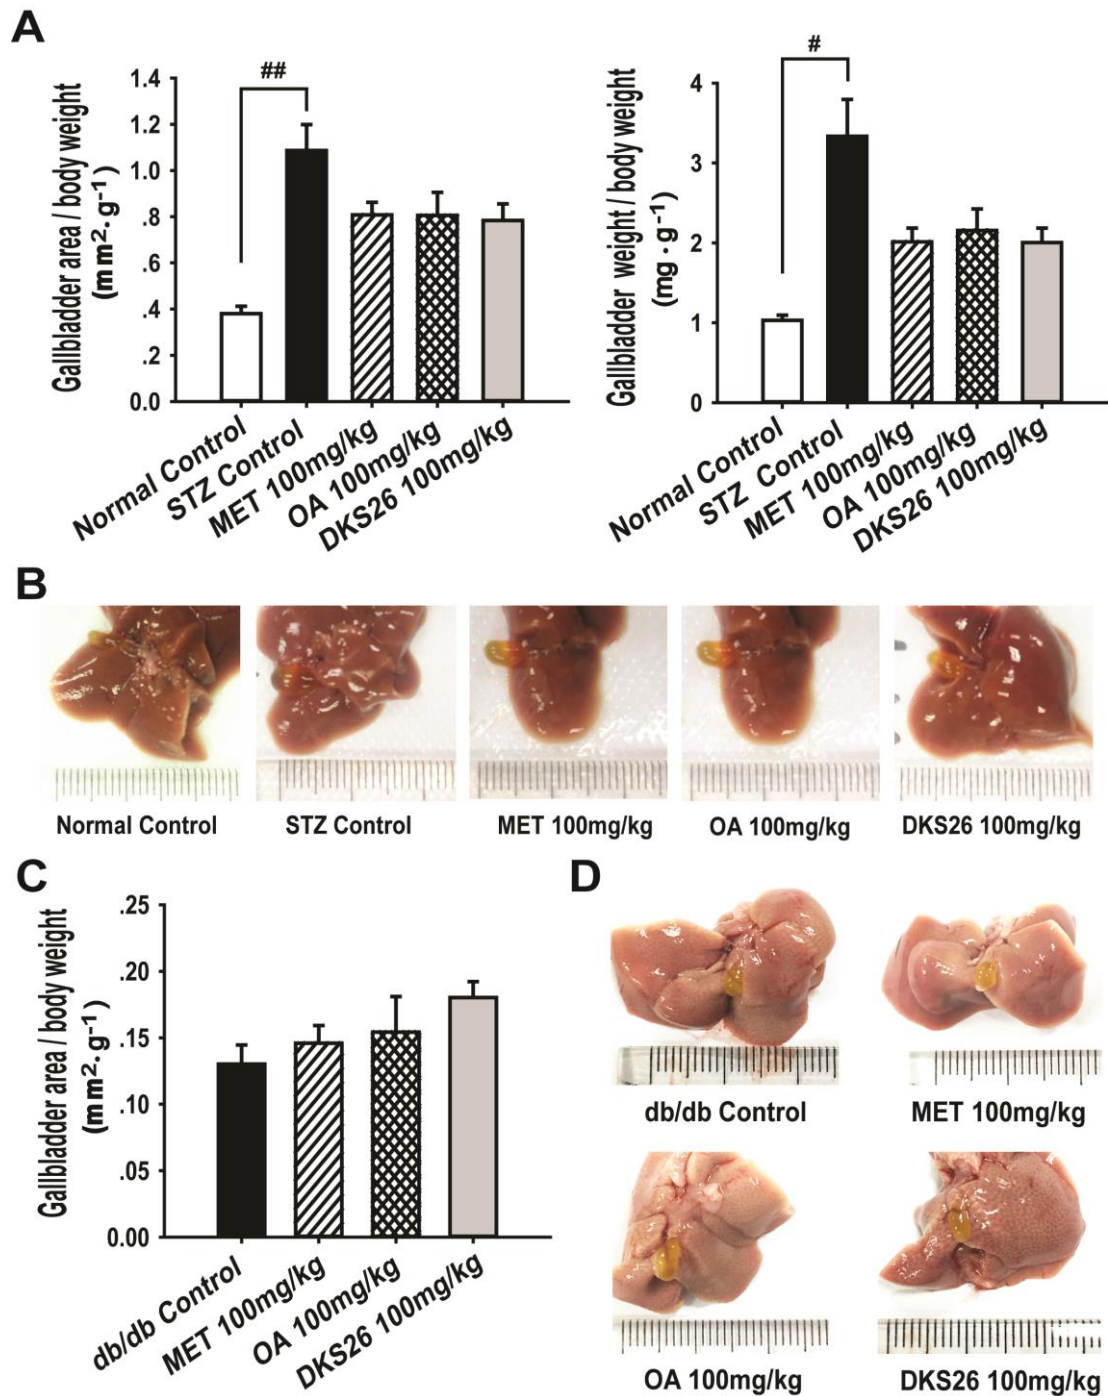

Figure S5 Effects of DKS26 on gallbladder size in STZ-induced and db/db diabetic mice. The gallbladders were removed 2h after the last administration and measured by a vernier caliper or analytical balance. The size of gallbladder was expressed as the cross-sectional area (length x width, mm<sup>2</sup>) or weight (mg) and corrected by body weight (g). (A) STZ-induced diabetic mice (normal control n= 5, STZ control n= 7 and other groups n= 8). (B) Db/db diabetic mice (db/db and metformin control n= 7, and other groups n= 8). OA represented oleanolic acid, MET represented metformin. Values are expressed as mean  $\pm$  SEM. Compared with normal control group, <sup>#</sup> $P < 0.05$ , <sup>##</sup> $P < 0.01$ .

Table S1 Effects of DKS26 on blood glucose with a single administration in STZ-induced diabetic mice.

| Groups         | Fasting blood glucose (mmol L <sup>-1</sup> ) |                         |                        |                         |                         |
|----------------|-----------------------------------------------|-------------------------|------------------------|-------------------------|-------------------------|
|                | Before                                        | 0.5h after              | 1h after               | 2h after                | 3h after                |
| Normal Control | 8.6±0.3                                       | 9.3±0.3                 | 8.7±0.4                | 7.1±0.8                 | 6.3±0.5                 |
| STZ Control    | 25.1±1.6 <sup>###</sup>                       | 30.0±2.1 <sup>###</sup> | 0.8±1.9 <sup>###</sup> | 30.7±1.1 <sup>###</sup> | 25.2±2.0 <sup>###</sup> |
| MET 100mg/kg   | 24.5±2.2                                      | 26.3±1.7                | 25.7±1.8               | 19.4±3.8*               | 14.4±3.8*               |
| OA 100mg/kg    | 25.9±2.3                                      | 25.0±3.6                | 24.5±3.6               | 22.3±3.3                | 19.7±1.4                |
| DKS26 100mg/kg | 26.1±1.9                                      | 24.5±1.5                | 22.6±3.4               | 16.9±3.2**              | 16.4±4.6                |

Values are expressed as mean ± SEM. STZ-induced diabetic mice (STZ control n= 6 and other groups n= 5). OA represented oleanolic acid, MET represented metformin. Compared with normal control group, <sup>###</sup>*P*<0.001; compared with STZ control group, \**P*<0.05, \*\**P*<0.01.

Table S2 The primer sequences used in this study.

| Primers                 | Sequences (5'→3')         |
|-------------------------|---------------------------|
| <i>gcg</i> forward      | GCACATTCACCAGCGACTACA     |
| <i>gcg</i> reverse      | TGACGTTTGGCAATGTTGTTC     |
| <i>PC3</i> forward      | CTTCTTTTCTCTCAGCCCTTCCTAC |
| <i>PC3</i> reverse      | CATTCATTGACAAACTGCCTCTTC  |
| <i>GAPDH</i> forward    | GTCATCCATGACAACCTTGG      |
| <i>GAPDH</i> reverse    | GAGCTTGACAAAGTGGTCGT      |
| <i>TNF-α</i> forward    | CCAGACCCTCACACTCAGATC     |
| <i>TNF-α</i> reverse    | CACTTGGTGGTTTGCTACGAC     |
| <i>IL-6</i> forward     | CCAGAGATACAAAGAAATGATGG   |
| <i>IL-6</i> reverse     | ACTCCAGAAGACCAGAGGAAAT    |
| <i>IL-1β</i> forward    | CTTCAGGCAGGCAGTATCACTCAT  |
| <i>IL-1β</i> reverse    | TCTAATGGGAACGTCACACACCAG  |
| <i>SREPB-1c</i> forward | CGACATCGAAGACATGCTTCAG    |
| <i>SREPB-1c</i> reverse | GGAAGGCTTCAAGAGAGGAGC     |
| <i>FAS</i> forward      | CCCTTGATGAAGAGGGATC       |
| <i>FAS</i> reverse      | ACTCCACAGGTGGGAACAAG      |
| <i>PPAR-α</i> forward   | TGTCGAATATGTGGGGACAA      |
| <i>PPAR-α</i> reverse   | AAACGGATTGCATTGTGTGA      |
| <i>CPT1</i> forward     | GCTCGCACATTACAAGGACAT     |
| <i>CPT1</i> reverse     | TGGACACCACATAGAGGCAG      |
| <i>β-actin</i> forward  | GGTCATCACTATTGGCAACG      |
| <i>β-actin</i> reverse  | ACGGATGTCAACGTCACACT      |
